# Supplementary material for: Subsidies alone are not enough to increase adoption of agricultural water management interventions
Source: Frontiers journal article supplement (doi:10.3389/frwa.2024.1444423), 2024-08-22
Supplement: Data_Sheet_1.docx [file Data_Sheet_1.docx]

**Annexures**

**Subsidies alone are not enough to increase adoption of agricultural water management interventions**

Mohammad Faiz Alam1,2,∗ ,Michael McClain2,3, Alok Sikka1 and Saket Pande2

1 International Water Management Institute, Delhi, India

2 Delft University of Technology, Delft, The Netherlands

3 IHE Delft Institute for Water Education, Delft, The Netherlands

∗ Author to whom any correspondence should be addressed.

Postal Address: 2nd Floor, CG Block C, NASC Complex, DPS Marg, Opp. Todapur, Pusa, New Delhi, Delhi 110012.

E-mail: m.f.alam@tudelft.nl; [m.alam@cgiar.org](mailto:m.alam@cgiar.org)

**Table S1: RANAS questions for Drip and Borewell.**

|  |  | **Drip Irrigation** | **Borewell** |
| --- | --- | --- | --- |
| **Category** | | **Questions** | |
| **Risk** | **R1** | How many drought/dry years have been there in last 10 years? | How many drought/dry years have been there in last 10 years? |
| **R2** | How high is the risk of your groundwater wells going dry in next 5 years? | How high is the risk of your groundwater wells going dry in next 5 years? |
| **R3** | How high is the risk of drought in coming 5 years? | How high is the risk of drought in coming 5 years? |
| **R4** | How severe will be the impact of drought on your crop production? | How severe will be the impact of drought on your crop production? |
| **R5** | How much GW decline will impact your crop production? | How much GW decline will impact your crop production? |
| **Attitude** | **AT1** | How beneficial drip irrigation is for crop production? | How beneficial borewell is for crop production? |
| **AT2** | How reliable is applying irrigation with drip irrigation? | How time consuming is to install a borewell? |
| **AT3** | How time consuming is to get a drip irrigation set up? | How reliable is irrigation water supply from borewell? |
| **Ability** | **AB1** | How confident are you in your financial capability to afford the drip irrigation system? [w/o subsidy] | How confident are/were you in your financial capability to afford the drilling of a BW? |
| **AB2** | How confident are you in your capacity/knowledge to install the drip irrigation system?] | How confident are/were you in your capacity/knowledge to install a BW? |
| **AB2** | How confident you are in your capability to operate and maintain the drip irrigation system? |  |
| **Norm** | **N1** | What proportion of people in your village have a drip irrigation system? | What proportion of people in your village have a borewell? |
| **N2** | Most people whose opinion I value think having drip irrigation is good? | Most people whose opinion I value think having borewell is good? |
| **N3** | How important are NGOs/government official opinions to you? | How important are NGOs/government official opinions to you? |
| **Self-regulation** | **SR1** | How much do you pay attention to how much water you use for irrigation? | Do you have a plan to acquire the required personnel and material it takes to drill a BW? |
| **SR2** | **-** | Do you have a plan if your BW doesn't yield water or stop giving water? |

Table S2: Socio-economic characteristics of farmers (source: Alam et al., 2022)

| Characteristics | Variable | Frequency (%) |
| --- | --- | --- |
| Land | < 1ha | 85 (17.3%) |
| 1-2 Ha | 155 (31.5%) |
| 2-4 Ha | 137 (27.8%) |
| >4 Ha | 115 (23.4%) |
| HH members | 0 - 2 | 52 (10.6%) |
| 2-4 | 140 (28.4%) |
| 4-8 | 240 (48.8%) |
| 8 | 60 (12.2%) |
| Age | < 25 | 13 (2.6%) |
| 25 - 40 | 122 (24.8%) |
| 40 - 60 | 275 (55.9%) |
| 60- 85 | 82 (16.6%) |
| Education | No schooling | 112 (22.8%) |
| Till 5th Grade | 158 (32.1%) |
| Till 8th Grade | 144 (29.3%) |
| Till 12th Grade | 64 (13%) |
| Bachelor and above | 14 (2.83%) |
| Income from Agriculture (%) | < 25 % | 47 (9.6%) |
| 25 – 50 % | 161 (32.7%) |
| 50 – 75 % | 100 (20.3%) |
| 75 – 100 % | 184 (37.4%) |
| Main sources of Income | Self-Employed in Agriculture | 488 (99.2%) |
| Agricultural wage labor | 42 (8.5%) |
| Livestock | 353 (71.7%) |
| Other non-agriculture related wage labor | 52 (10.6%) |
| Non-agriculture related business | 103 (20.9%) |
| Salary | 44 (8.9%) |
| Pension | 3 (0.6%) |
| HH type | Pucca (Brick and mortar) | 322 (65.4%) |
| semi-pucca (Thatched roof with brick and mortar) | 151 (30.6%) |
| Kuccha | 18 (0.04%) |
| Things owned | TV | 413 (83.9%) |
| Car | 36 (7.3%) |
| 2-wheeler | 439 (89.2%) |
| Fridge | 282 (57.3%) |
| AC | 9 (1.8%) |
| Gas connection | 424 (86.2%) |
| none | 17 (3.5%) |
